# Supplementary material for: Quantifying land carbon cycle feedbacks under negative CO 2 emissions
Source: Copernicus journal article supplement (doi:10.5194/bg-20-2283-2023), 2023-06-20
Supplement: Supplementary file 1 [file bg-20-2283-2023-supplement.pdf]

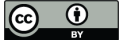

*Supplement of*

## **Quantifying land carbon cycle feedbacks under negative CO<sub>2</sub> emissions**

**V. Rachel Chimuka et al.**

*Correspondence to:* V. Rachel Chimuka ([rchimuka@sfu.ca](mailto:rchimuka@sfu.ca))

The copyright of individual parts of the supplement might differ from the article licence.

## Quantifying Land Carbon Cycle Feedbacks under Negative CO<sub>2</sub> Emissions

### A. Supplementary Material

**Table S1:** Comparison of carbon cycle feedback parameters from the ramp-up phase of the “CDR-reversibility” experiment to CMIP5 and CMIP6 model means and mean±1 standard deviations from Figures 5, 6 in Arora et al. (2020), calculated at the time atmospheric CO<sub>2</sub> concentration quadruples (4xCO<sub>2</sub>). Model means and mean±1 standard deviations for models without a nitrogen cycle are shown in parentheses. Feedback parameters were calculated using the FULL -BGC approach (see Eq. 7), consistent with the BGC-COU (T\*=0) approach used in calculating feedback parameters in CMIP5 and CMIP6.

| Feedback Parameters<br>(taken at 4xCO <sub>2</sub> ) | “CDR-reversibility”<br>ramp up | CMIP5                        | CMIP6                          |
|------------------------------------------------------|--------------------------------|------------------------------|--------------------------------|
| $\beta_L$ (PgC ppm <sup>-1</sup> )                   | 0.96                           | 0.91 ± 0.48<br>(1.2 ± 0.3)   | 0.96 ± 0.39<br>(1.2 ± 0.5)     |
| $\beta_O$ (PgC ppm <sup>-1</sup> )                   | 0.88                           | 0.81 ± 0.07                  | 0.78 ± 0.07                    |
| $\gamma_L$ (PgC °C <sup>-1</sup> )                   | -121.5                         | -54.7 ± 36<br>(-75.4 ± 23.9) | -42.7 ± 47.2<br>(-63.8 ± 70.5) |
| $\gamma_O$ (PgC °C <sup>-1</sup> )                   | -22.7                          | -16.3 ± 3.5                  | -16.4 ± 4.6                    |

**Table S2:** Comparison of carbon cycle feedback parameters from the ramp-up phase of the “CDR-reversibility” experiment to CMIP5 and CMIP6 model means and mean±1 standard deviations from Table A1 in Arora et al. (2020), calculated at the time atmospheric CO<sub>2</sub> concentration doubles (2xCO<sub>2</sub>). Feedback parameters were calculated using the FULL -BGC approach (see Eq. 7), consistent with the BGC-COU (T\*=0) approach. Note that there is a small discrepancy with the BGC-COU approach used to calculate the values in Table A1 of Arora et al., 2020, which allows for T\*≠0.

| Feedback Parameters<br>(taken at 2xCO <sub>2</sub> ) | “CDR-reversibility”<br>ramp up | CMIP5          | CMIP6         |
|------------------------------------------------------|--------------------------------|----------------|---------------|
| $\beta_L$ (PgC ppm <sup>-1</sup> )                   | 1.27                           | 1.15 ± 0.63    | 1.22 ± 0.40   |
| $\beta_O$ (PgC ppm <sup>-1</sup> )                   | 0.99                           | 0.95 ± 0.07    | 0.91 ± 0.09   |
| $\gamma_L$ (PgC °C <sup>-1</sup> )                   | -83.5                          | -37.01 ± 25.48 | -34.1 ± 38.39 |
| $\gamma_O$ (PgC °C <sup>-1</sup> )                   | -3.30                          | -9.42 ± 2.70   | -8.59 ± 2.9   |

# Quantifying Land Carbon Cycle Feedbacks under Negative CO<sub>2</sub> Emissions

## B. Supplementary Figures

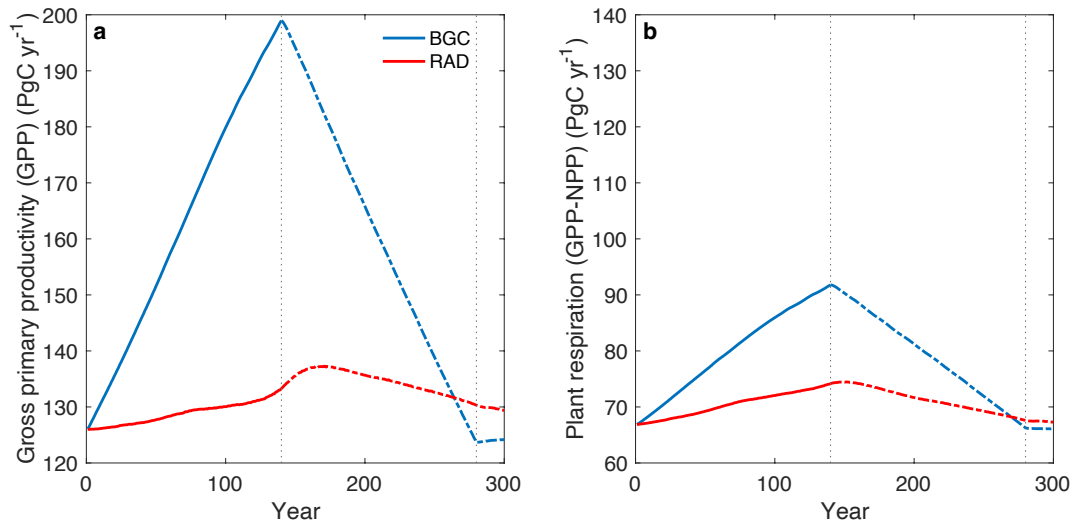

**Figure S1:** a. Gross primary productivity and b. plant respiration for the biogeochemically coupled (BGC) and radiatively coupled (RAD) “CDR-reversibility” simulations. (+) refers to the ramp-up phase, (-) refers to the ramp-down phase. Note the differences in scale: plant respiration rates are generally lower than gross primary productivity rates.

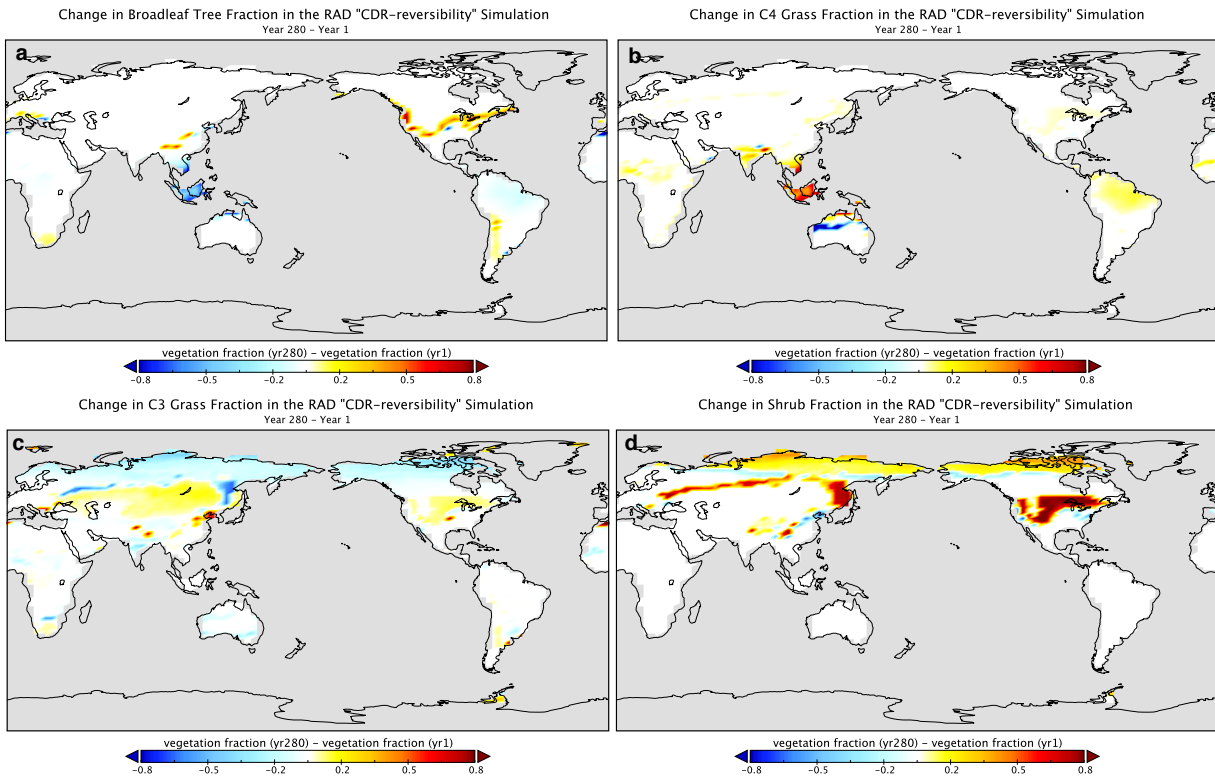

**Figure S2:** Vegetation fraction changes for a. broadleaf trees b. C4 grasses and c. C3 grasses and d. shrubs taken at the end of the radiatively coupled (RAD) “CDR-reversibility” simulation relative to 1850 (preindustrial).

# Quantifying Land Carbon Cycle Feedbacks under Negative CO<sub>2</sub> Emissions

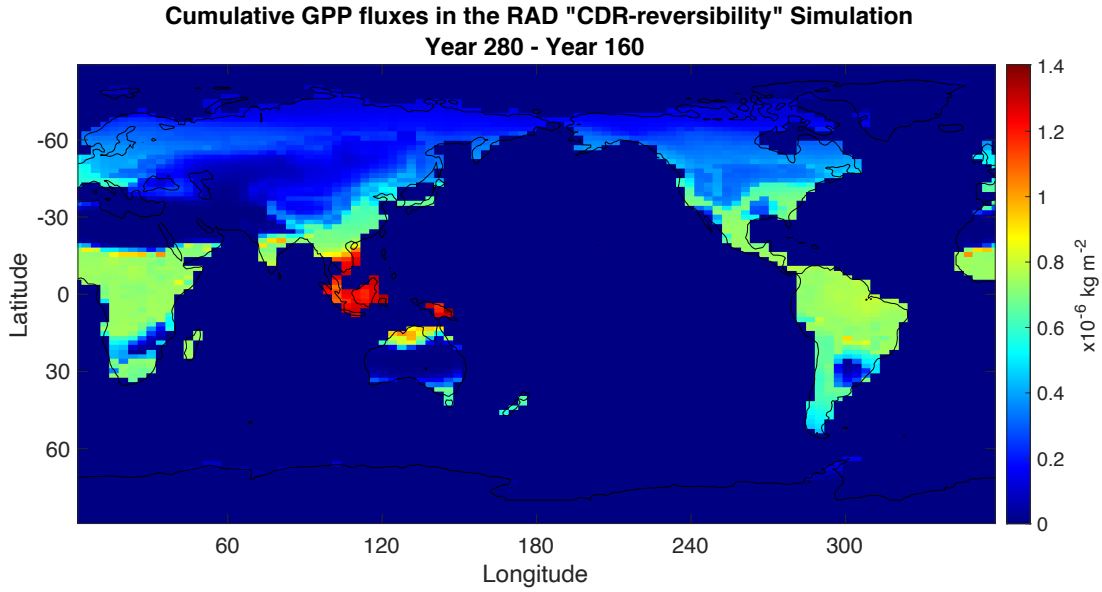

**Figure S3:** Cumulative gross primary productivity (GPP) fluxes for the radiatively coupled (RAD) “CDR-reversibility” simulation calculated from year 160 to year 280.

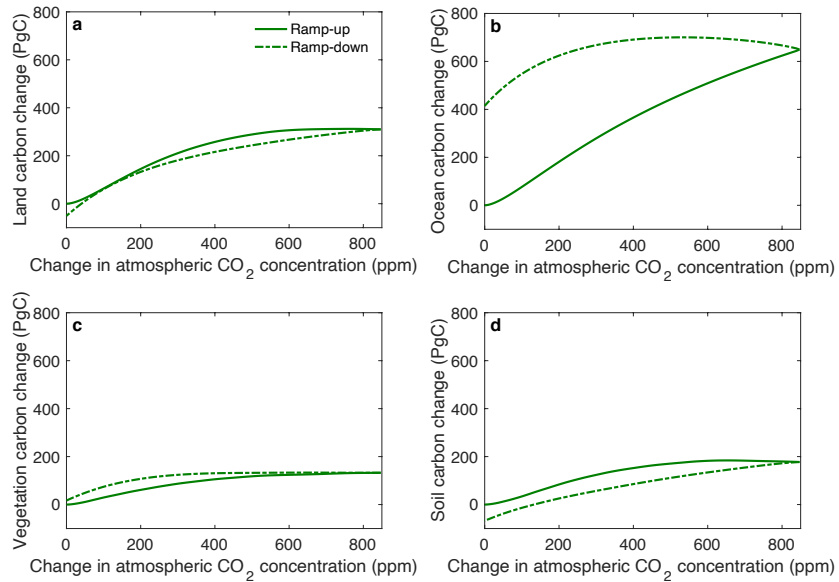

**Figure S4:** a. Land b. ocean c. vegetation and d. soil carbon pool changes as a function of atmospheric CO<sub>2</sub> concentration, taken from the fully coupled (FULL) “CDR-reversibility” simulation ramp-up and ramp-down phases. All values are calculated relative to 1850 (preindustrial).

## Quantifying Land Carbon Cycle Feedbacks under Negative CO<sub>2</sub> Emissions

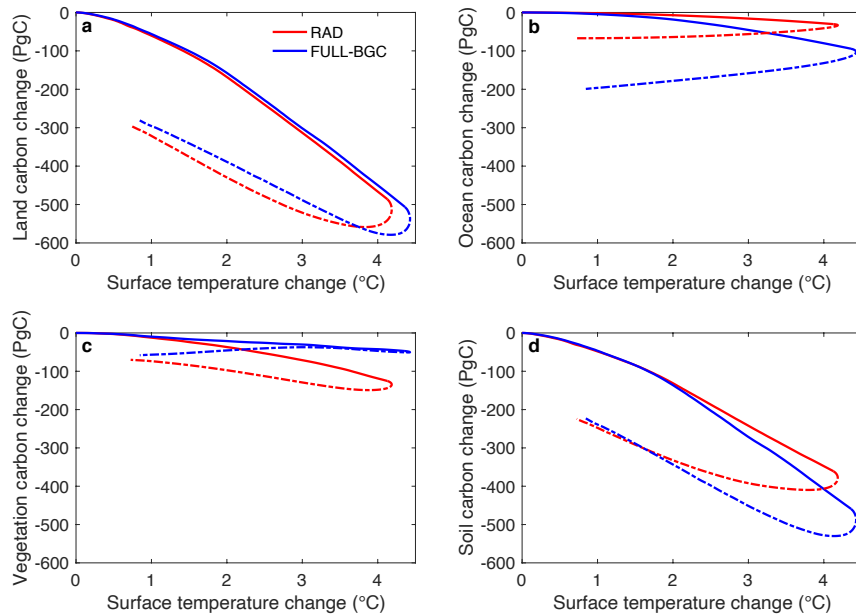

**Figure S5:** a. Land b. ocean c. vegetation and d. soil carbon pool changes as a function of surface air temperature change, calculated from the radiatively coupled simulation (RAD) and the difference between the fully coupled and biogeochemically coupled “CDR-reversibility” simulations (FULL-BGC). All values are calculated relative to 1850 (preindustrial). Solid lines represent the ramp-up phase; dot-dashed lines represent the ramp-down phase.

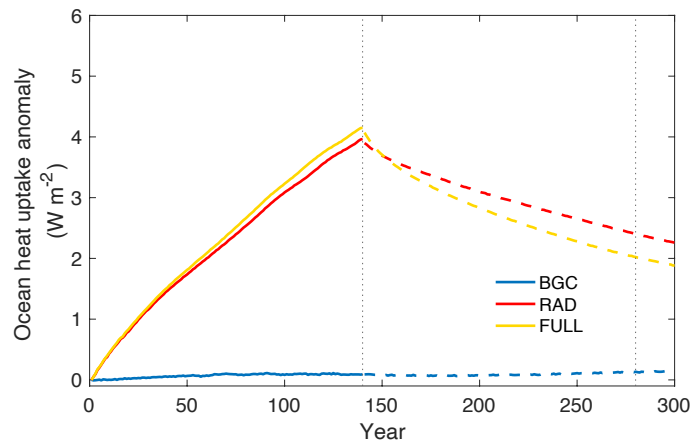

**Figure S6:** Ocean heat uptake anomaly in the ramp-up phase of the “CDR-reversibility” simulations (solid lines) and the zero emissions simulations (dashed lines) calculated relative to 1850 (preindustrial). BGC – biogeochemically coupled; RAD – radiatively coupled; FULL – fully coupled

## References

Arora, V. K., Katavouta, A., Williams, R. G., Jones, C. D., Brovkin, V., Friedlingstein, P. ... Ziehn, T. (2020). Carbon-concentration and carbon-climate feedbacks in CMIP6 models, and their comparison to CMIP5 models. *Biogeosciences*, 17, 4173-4222. doi.org/10.5194/bg-17-4173-2020
